# Supplementary material
Source: PubMed Central journal article supplement (PMC6855964)
Supplement: nmz003_supplemental_file.pdf [file nmz003_supplemental_file.pdf]

**Supplemental Table 1.** Prospective studies on total legume consumption and cardiovascular disease incidence in 163,974 participants.

| <b>First Author<br/>(Reference)</b> | <b>Study</b>         | <b>Country</b> | <b>Participants</b>                                | <b>Years of<br/>Follow-Up</b> | <b>Exposure</b>                                                                                           |
|-------------------------------------|----------------------|----------------|----------------------------------------------------|-------------------------------|-----------------------------------------------------------------------------------------------------------|
| Bazzano et al. (20)                 | NHANES I             | USA            | 9,632 men and women                                | 19                            | Soybeans, dry beans and peas like pinto beans, red beans, black-eye [sic] peas, peanuts and peanut butter |
| Martinez-Gonzalez et al. (21)       | The SUN              | Spain          | 13,609 men and women                               | 4.9                           | Unspecified legumes                                                                                       |
| Nouri et al. (22)                   | Isfahan Cohort study | Iran           | 6,504 men and women                                | 6.8                           | Unspecified legumes                                                                                       |
| Stewart et al. (24)                 | STABILITY trial      | Global         | 15,482 patients with stable coronary heart disease | 3.7                           | Tofu/soybean curd (textured vegetable protein, soya milk, etc.)                                           |
| Miller et al. (23)                  | PURE                 | 18 countries   | 135,335 men and women                              | 7.4                           | Legumes (beans, black beans, lentils, peas, chickpeas, and black-eyed peas)                               |

NHANES I, First National Health and Nutrition Examination Survey; PURE, Prospective Urban Rural Epidemiology; STABILITY, Stabilisation of atherosclerotic plaque by initiation of darapladib therapy; SUN, Seguimiento Universidad de Navarra

**Supplemental Table 2.** Prospective studies on total legume consumption and coronary heart disease incidence in 184,129 participants.

| <b>First Author (Year)<br/>(Reference)</b> | <b>Study</b>           | <b>Country</b> | <b>Participants</b>        | <b>Years of<br/>Follow-Up</b> | <b>Exposure</b>                                                                                              |
|--------------------------------------------|------------------------|----------------|----------------------------|-------------------------------|--------------------------------------------------------------------------------------------------------------|
| Bazzano et al. (20)                        | NHANES I               | USA            | 9,632 men and<br>women     | 19                            | Soy legumes, dry beans and peas like pinto beans, red beans, black-eye [sic] peas, peanuts and peanut butter |
| Buckland et al. (27)                       | EPIC-<br>Spanish study | Spain          | 15,335 men<br>25,422 women | 10.4                          | Unspecified legumes                                                                                          |
| Bernstein et al. (28)                      | NHS                    | USA            | 84,136 women               | 26                            | Beans or lentils, baked or dry                                                                               |
| Martinez-Gonzalez et al. (21)              | The SUN<br>study       | Spain          | 13,609 men and<br>women    | 4.9                           | Unspecified legumes                                                                                          |
| Dilis et al. (29)                          | EPIC-Greek<br>study    | Greece         | 9,740 men<br>14,189 women  | 10                            | Unspecified legumes                                                                                          |
| Haring et al. (30)                         | ARIC                   | USA            | 12,066 men and<br>women    | 22                            | Unspecified legumes                                                                                          |

ARIC, Atherosclerosis Risk in Communities; EPIC, European Prospective Investigation into Cancer and Nutrition; NHANES I, First National Health and Nutrition Examination Survey; NHS, Nurses' Health Study; SUN, Seguimiento Universidad de Navarra.

**Supplemental Table 3.** Prospective studies on total legume consumption and stroke incidence in 342,079 participants.

| <b>First Author (Year)<br/>(Reference)</b> | <b>Study</b>                                    | <b>Country</b> | <b>Participants</b>        | <b>Years of<br/>Follow-Up</b> | <b>Exposure</b>                                                             |
|--------------------------------------------|-------------------------------------------------|----------------|----------------------------|-------------------------------|-----------------------------------------------------------------------------|
| Kokubo et al. (18)                         | Japan Public Health Center-based                | Japan          | 19,466 men<br>20,984 women | 12.5                          | Soy legumes                                                                 |
| Mizrahi et al. (33)                        | Finnish Mobile Clinic Health Examination Survey | Finland        | 3,932 men and women        | 24                            | Unspecified legumes                                                         |
| Bernstein et al. (34)                      | NHS + HPFS                                      | USA            | 43,150 men<br>84,010 women | 26 NHS +<br>22 HPFS           | Legumes (dry beans, peas, soy, and tofu)                                    |
| Misirli et al. (35)                        | EPIC-Greek study                                | Greece         | 23,601 men and women       | 10.6                          | Unspecified legumes                                                         |
| Haring et al. (36)                         | ARIC                                            | USA            | 11,601 men and women       | 22                            | Unspecified legumes                                                         |
| Miller et al. (23)                         | PURE                                            | 18 countries   | 135,335 men and women      | 7.4                           | Legumes (beans, black beans, lentils, peas, chickpeas, and black-eyed peas) |

ARIC, Atherosclerosis Risk in Communities; EPIC, European Prospective Investigation into Cancer and Nutrition; HPFS, Health Professionals Follow-Up Study; NHS, Nurses' Health Study; PURE, Prospective Urban Rural Epidemiology; SUN, Seguimiento Universidad de Navarra.

**Supplemental Table 4.** Prospective studies on total legume consumption and type 2 diabetes incidence in 539,752 participants.

| First Author, Year      | Study                     | Country   | Participants                                                                                                 | Years of Follow-Up | Exposure                                                                                                            |
|-------------------------|---------------------------|-----------|--------------------------------------------------------------------------------------------------------------|--------------------|---------------------------------------------------------------------------------------------------------------------|
| Meyer et al. (42)       | Iowa Women's Health Study | USA       | 35,988 postmenopausal women                                                                                  | 6                  | Mature beans                                                                                                        |
| Hodge et al. (43)       | MCCS                      | Australia | 31,641 otherwise healthy participants                                                                        | 4                  | Bean, pea, or lentil soup; green beans or peas; cooked dried bean, chickpea, or lentil dish (including baked beans) |
| Bazzano et al. (44)     | NHSI                      | USA       | 71,346 female nurses                                                                                         | 18                 | Tofu, peas and beans                                                                                                |
| Villegas et al. (45)    | SWHS                      | China     | 64,227 middle-aged women                                                                                     | 4.6                | Peanuts, soybeans and other legumes                                                                                 |
| Nanri et al. (46)       | JPHC                      | Japan     | 25,872 men<br>33,3919 women                                                                                  | 5                  | Soy products (Miso soup, tofu, yushidofu, koyadofu, aburaage, natto and soy milk)                                   |
| Morimoto et al. (47)    | MEC                       | Hawaii    | 36,212 men<br>39,132 women                                                                                   | 14                 | Tofu, miso, soup and vegetarian-meat products                                                                       |
| Mueller et al. (48)     | SCHS                      | Singapore | 43,176 healthy participants                                                                                  | 5.7                | Total unsweetened soy                                                                                               |
| Ericson et al. (50)     | MDC                       | Sweden    | 20,550 men<br>16,590 women                                                                                   | 12                 | Not described                                                                                                       |
| Tatsumi et al. (40)     | Saku study                | Japan     | 862 men with low BMI<br>876 men with high BMI                                                                | 4                  | Soybeans products (soybean, tofu, koyadofu, aburaage and natto)                                                     |
| Von Ruesten et al. (49) | EPIC-Potsdam study        | Germany   | 23,531 otherwise healthy participants                                                                        | 8                  | Green beans, green peas, lentil/pea/bean stew                                                                       |
| Ding et al. (51)        | NHSII<br><br>HPFS         | USA       | 79,061 younger female nurses<br><br>21,281 male dentist, pharmacists, vegetarians, optometrists, osteopathic | NR                 | Tofu and soymilk                                                                                                    |

Supplementary Data

|                              |            |       |                                             |     |                                                                |
|------------------------------|------------|-------|---------------------------------------------|-----|----------------------------------------------------------------|
|                              |            |       | physicians and podiatrists                  |     |                                                                |
| Becerra-Tomás et al. (14)    | PREDIMED   | Spain | 3,349 elderly participants at high CVD risk | 4.3 | Non-soy legumes (lentils, chickpeas, dry beans and fresh peas) |
| Khalili-Moghadam et al. (41) | TLGS study | Iran  | 2,139 participants aged $\geq 20$ years     | 6   | Non-described                                                  |

EPIC, European Prospective Investigation into Cancer and Nutrition; HPFS, Health Professionals Follow-up Study; JPHC, Japan Public Health Center-Based Prospective study; MCCS, Melbourne Collaborative cohort study; MDC, Malmo Diet and Cancer study; MEC, Multiethnic Cohort study; NHS, Nurses' Health Study; NR, non-reported; PREDIMED, PREvención con DIeta MEDiterránea Study; SCHS, Singapore Chinese Health Study; TLGS, Tehran Lipid and Glucose Study.

Supplementary Data

| MEDLINE (Pubmed) |                                                                                                                                                                                                      |
|------------------|------------------------------------------------------------------------------------------------------------------------------------------------------------------------------------------------------|
| 1                | "legumes"[All Fields] OR "dietary pulses"[All Fields] OR "soy"[All Fields] OR "soybeans"[All Fields] OR "fabaceae"[MeSH Terms]                                                                       |
| 2                | cardiovascular diseases [Mesh Terms] OR "cardiovascular diseases"[All Fields] OR "coronary heart disease"[All Fields] OR "coronary disease"[All Fields] OR "Stroke"[All Fields] OR "CVD"[All Fields] |
| 3                | diabetes mellitus, type 2[MeSH Terms] OR "type 2 diabetes"[All fields] OR "diabetes"[All fields] OR "type 2 diabetes mellitus"[All fields] OR "diabetes mellitus"[All fields]                        |
| 4                | #1 AND (#2 OR #3)                                                                                                                                                                                    |

**Supplemental Figure 1.** Literature search strategy.

Supplementary Data

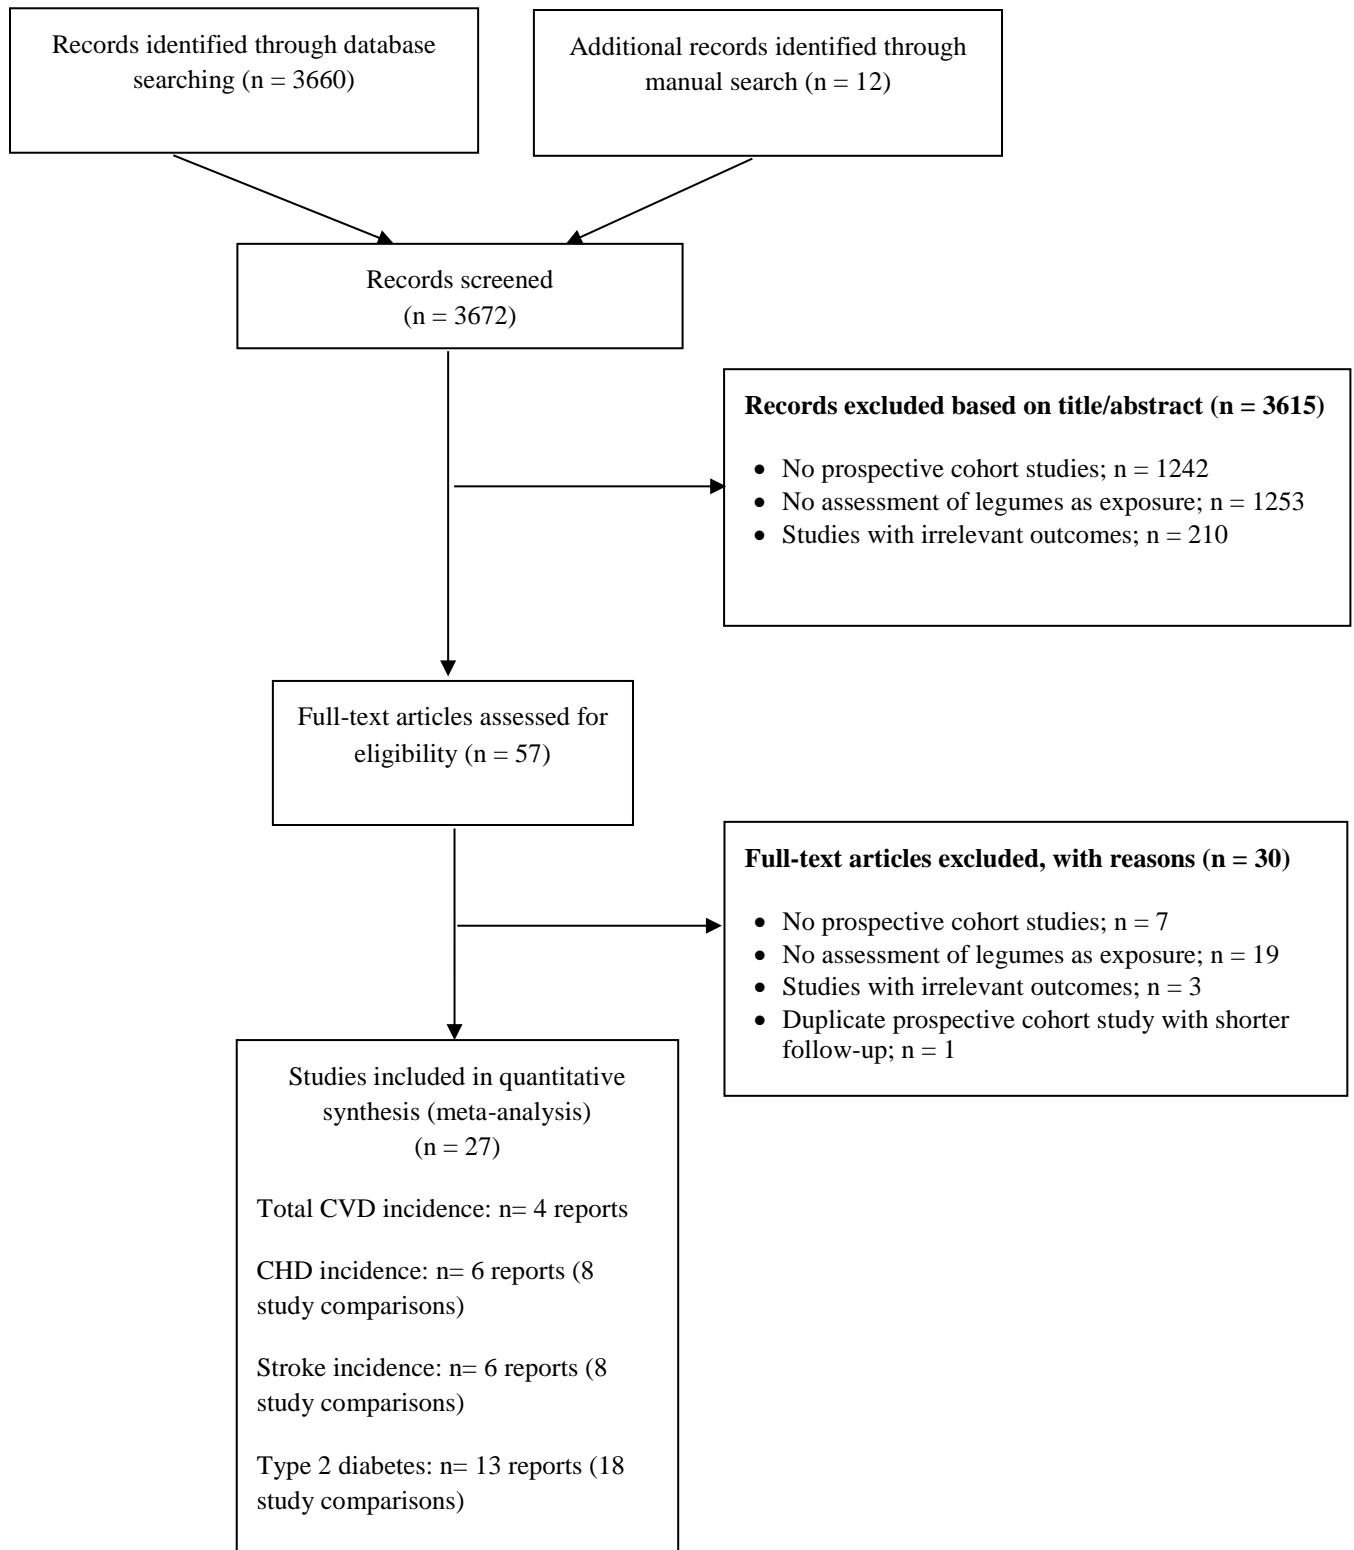

**Supplemental Figure 2.** PRISMA flow diagram. CHD, coronary heart disease; CVD, cardiovascular disease
